# Supplementary material
Source: PubMed Central journal article supplement (PMC7979498)
Supplement: NIHMS1661622-supplement-1.pdf [file NIHMS1661622-supplement-1.pdf]

## Journal of Hepatology

### CTAT methods

Tables for a “Complete, Transparent, Accurate and Timely account” (CTAT) are now mandatory for all revised submissions. The aim is to enhance the reproducibility of methods.

- Only include the parts relevant to your study
- Refer to the CTAT in the main text as ‘Supplementary CTAT Table’
- Do not add subheadings
- Add as many rows as needed to include all information
- Only include one item per row

**If the CTAT form is not relevant to your study, please outline the reasons why:**

|  |
|--|
|  |
|--|

#### 1.1 Antibodies

| Name                            | Citation | Supplier                  | Cat no.   | Clone no. |
|---------------------------------|----------|---------------------------|-----------|-----------|
| RNase7                          |          | Abcam                     | #ab205565 | 4C4       |
| ROS1                            |          | Abcam                     | #ab5512   |           |
| Phosphor-ROS1 (Tyr2274)         |          | Cell Signaling Technology | #3078     |           |
| Phosphor-ROS1 (Tyr2274)         |          | Thermo Fisher Scientific  | PA5-64608 |           |
| Phosphor-ERK1/2 (Thr202/Tyr204) |          | Cell Signaling Technology | #9101     |           |
| ERK1/2                          |          | Cell Signaling Technology | #9102     |           |
| Flag                            |          | Sigma-Aldrich             | #F1804    | M2        |
| Tubulin                         |          | Abcam                     | ab11304   | B-5-1-2   |
| Phosphor-ROS1 (Tyr2274)         |          | This paper                |           |           |

#### 1.2 Cell lines

| Name     | Citation                             | Supplier                          | Cat no.  | Passage no. | Authentication test method |
|----------|--------------------------------------|-----------------------------------|----------|-------------|----------------------------|
| HEK-293T |                                      | ATCC                              | CRL-3216 | 8           | STR fingerprinting         |
| WRL68    |                                      | ATCC                              | CL-48    | 5           | STR fingerprinting         |
| HepG2    |                                      | ATCC                              | HB-8065  | 12          | STR fingerprinting         |
| HA59T    | Oncogene (2011) 30, 1773–1783 & 2011 | China Medical University Hospital |          | 4           | STR fingerprinting         |

|        |                                      |                                   |         |    |                    |
|--------|--------------------------------------|-----------------------------------|---------|----|--------------------|
| Huh7   | Oncogene (2011) 30, 1773–1783 & 2011 | China Medical University Hospital |         | 5  | STR fingerprinting |
| Hep3B  |                                      | ATCC                              | HB-8064 | 4  | STR fingerprinting |
| Tong   | Oncogene (2011) 30, 1773–1783 & 2011 | China Medical University Hospital |         | 5  | STR fingerprinting |
| SKHeP1 | Oncogene (2011) 30, 1773–1783 & 2011 | China Medical University Hospital |         | 5  | STR fingerprinting |
| HeLa   |                                      | ATCC                              | CCL-2   | 15 | STR fingerprinting |

### 1.3 Organisms

| Name      | Citation | Supplier               | Strain | Sex  | Age      | Overall n number |
|-----------|----------|------------------------|--------|------|----------|------------------|
| J:NU mice |          | The Jackson Laboratory | 007850 | male | 4-6weeks | 120              |

### 1.4 Sequence based reagents

| Name                            | Sequence                                                       | Supplier      |
|---------------------------------|----------------------------------------------------------------|---------------|
| shRNA targeting human ROS1 #1   | CCGGCCACAGCTACAAACCAACAACTCG<br>AGTTTGTTGGTTTGTAGCTGTGGTTTTT   | Sigma-Aldrich |
| shRNA targeting human ROS1 #2   | CCGGCTGTGGATGGAGATCTTATATCTCGAGA<br>TATAAGATCTCCATCCACAGTTTTTG | Sigma-Aldrich |
| shRNA targeting human RNase7 #1 | CCGTCTTTGGCTGACCTTCAATTCCTCGAG<br>GAATTGAAGGTCAGCCAAAGATTTTTG  | Sigma-Aldrich |
| shRNA targeting human RNase7 #2 | CCGGGGGATTGTATGCCTTCTTTATCTCGAG<br>ATAAAGAAGGCATACAATCCCTTTTTG | Sigma-Aldrich |

### 1.5 Biological samples

| Description             | Source             | Identifier |
|-------------------------|--------------------|------------|
| Human plasma samples    | Zhongshan Hospital | NA         |
| Human tissue microarray | Zhongshan Hospital | NA         |

### 1.6 Deposited data

| Name of repository | Identifier | Link           |
|--------------------|------------|----------------|
| RNaseq data        | This paper | GEO: GSE156510 |

## 1.7 Software

| Software name   | Manufacturer                                         | Version |
|-----------------|------------------------------------------------------|---------|
| GraphPad Prism  | GraphPad Software                                    | 8.0.2   |
| ImageJ          | NIH                                                  | 1.52a   |
| R               | The R foundation                                     | 3.6.1   |
| Microcal Origin | Microcal Software, Inc.                              | 7.0     |
| Cluspro         | Vajda Lab at Boston University                       | 2.0     |
| UCSF Chimera    | RBVI at the University of California, San Francisco. | 1.11.2  |
| PyMOL           | Schrödinger Inc.                                     | 2.3.3   |

## 1.8 Other (e.g. drugs, proteins, vectors etc.)

|                                  |                    |              |
|----------------------------------|--------------------|--------------|
| Crizotinib                       | Selleck Chemicals  | #PF-02341066 |
| Ceritinib                        | Selleck Chemicals  | #S7083       |
| Recombinant Human RNases Protein | This paper         |              |
| pCDH-CMV-MCS-EF1-Puro            | System Biosciences | #CD510B-1    |
| pCDH-CMV-MCS-EF1-Neo             | System Biosciences | #CD514B-1    |

## 1.9 Please provide the details of the corresponding methods author for the manuscript:

|                                                                                                                                                                                  |
|----------------------------------------------------------------------------------------------------------------------------------------------------------------------------------|
| Mien-Chie Hung, PhD; President of China Medical University; Address: 91 Hsueh-Shih Rd Taichung, Taiwan 40402; Tel: 886-4-22057153; Fax: 886-4-22060248; E-mail: mhung@cmu.edu.tw |
|----------------------------------------------------------------------------------------------------------------------------------------------------------------------------------|

## 2.0 Please confirm for randomised controlled trials all versions of the clinical protocol are included in the submission. These will be published online as supplementary information.

|  |
|--|
|  |
|--|
